# Supplementary material for: High magnetisation, monodisperse and water-dispersible CoFe@Pt core/shell nanoparticles
Source: Royal Society of Chemistry journal article supplement (doi:10.1039/c6nr09325f), 2017-01-01
Supplement: c6nr09325f1.pdf [file c6nr09325f1.pdf]

## Supplement

### High Magnetisation, Monodisperse and Water-dispersible CoFe@Pt Core/shell Nanoparticles

Le T. Lu<sup>a\*</sup>, Ngo T. Dung<sup>a</sup>, Nguyen V. Long<sup>b\*</sup>, Le T. Tam<sup>c</sup>, Pham H. Nam<sup>d</sup>, Le D. Tung<sup>e,f</sup>, Nguyen X. Phuc<sup>d</sup> and Nguyen T. K. Thanh<sup>e,f\*</sup>.

**Table S1:** Experimental conditions for synthesis of CoFe NPs

| Precursors (mmol) |     | Surfactants (mmol) |     |      | Reaction time | Size    |          |
|-------------------|-----|--------------------|-----|------|---------------|---------|----------|
| Co                | Fe  | OA                 | OLA | TOPO | (min)         | (nm)    |          |
| 0.75              | 1.5 | 0.6                | 0.6 |      | 5             | 7.2±0.7 |          |
|                   |     |                    |     |      | 30            | 8.7±0.7 |          |
|                   |     |                    |     |      | 45            | 8.6±0.6 |          |
|                   |     |                    |     |      | 60            | 8.9±0.7 |          |
|                   |     | 0.3                | 0.3 |      | 30            | 9.3±0.9 |          |
|                   |     | 0.1                | 0.1 |      | 30            | 9.9±1.2 |          |
|                   |     |                    |     |      | 0.3           | 30      | 11.4±1.2 |
|                   |     | 03                 |     |      | 03            | 30      | 9.8±0.8  |
|                   |     |                    |     | 03   | 03            | 30      | 6.7±0.7  |
|                   |     | 06                 |     |      | 03            | 30      | 7.3±0.7  |
|                   |     | 06                 | 03  | 30   | 5.6±0.5       |         |          |

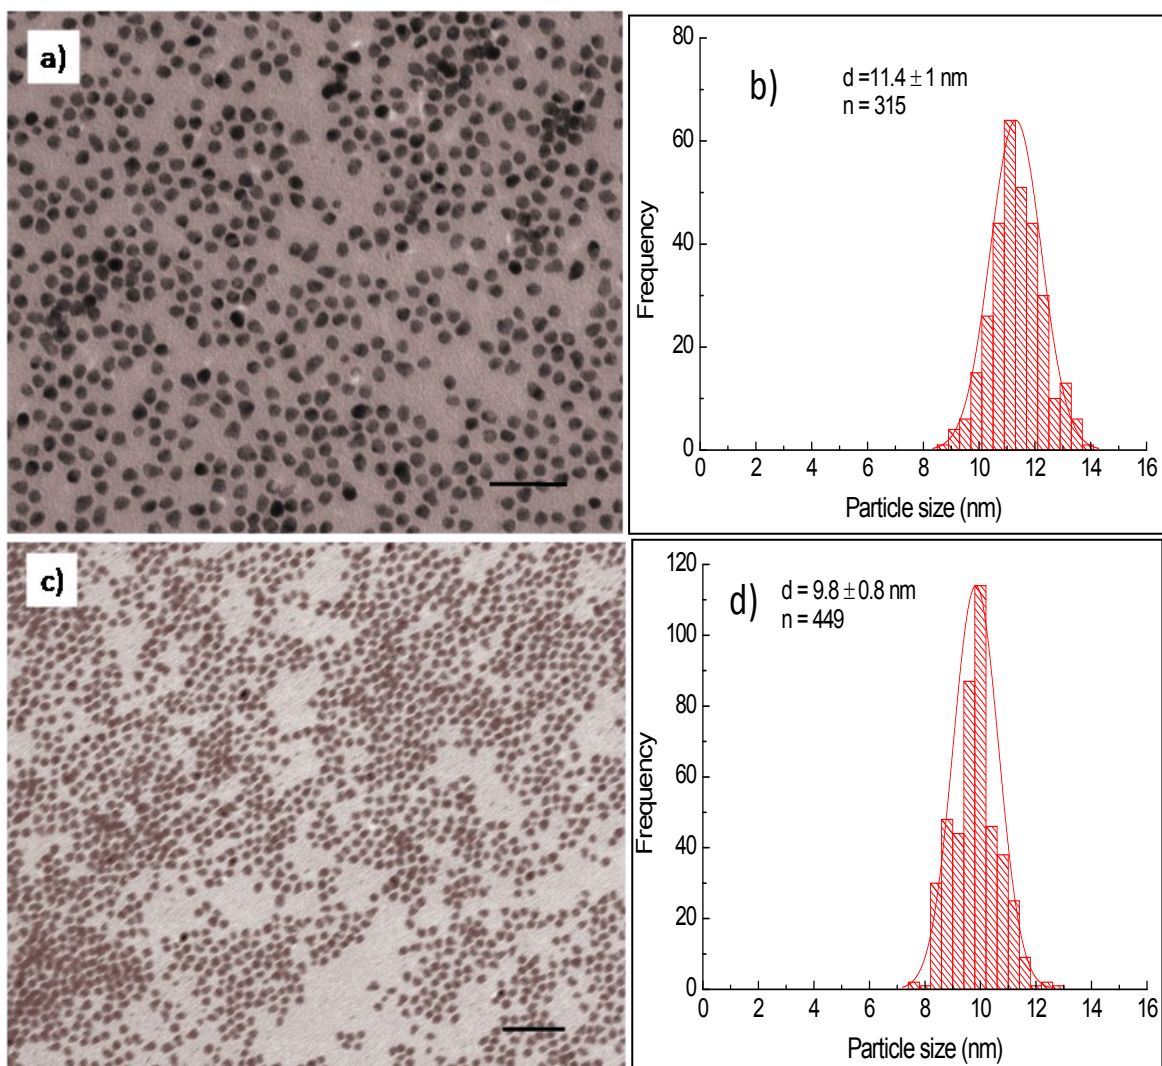

**Figure S1:** TEM images and size distribution histograms of CoFe nanoparticles synthesised in: a,b). 0.3 mmol TOPO and c,d) 0.3 mmol OA+0.3 mmol TOPO. Scale bar: 50 nm.

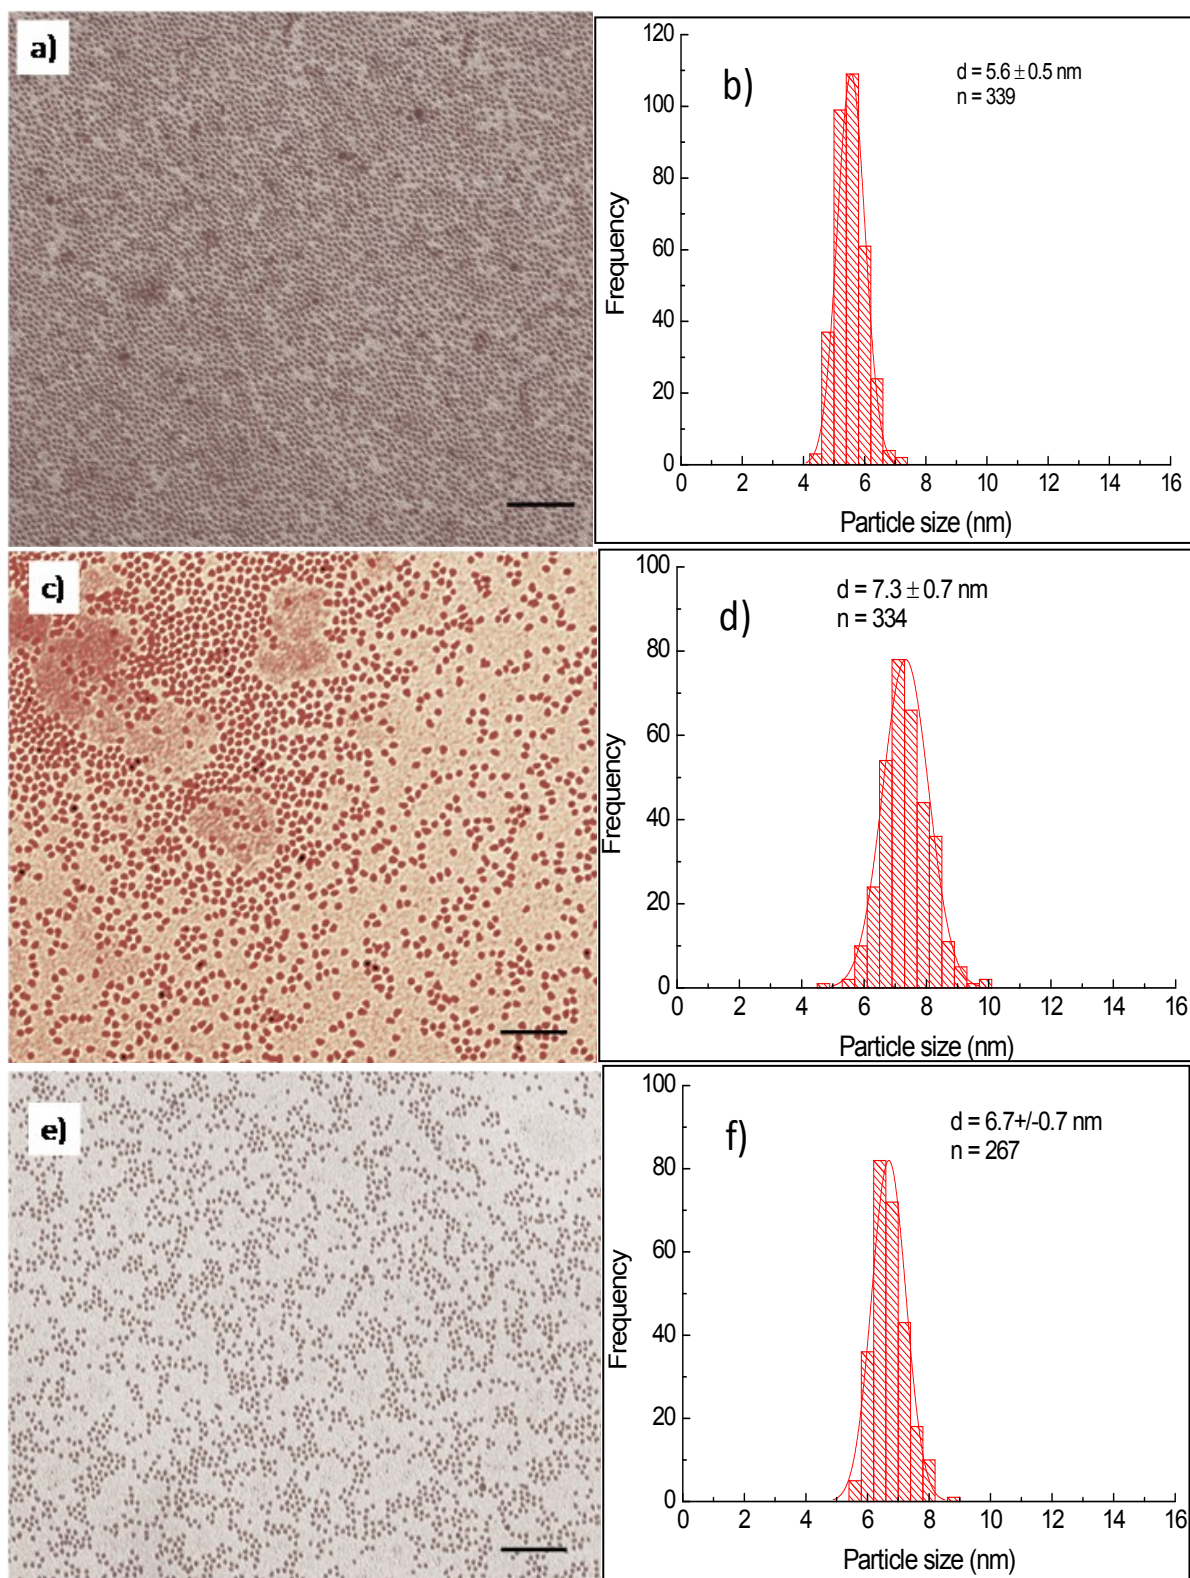

**Figure S2:** TEM images and size distribution histograms of CoFe nanoparticles synthesised in: a, b) 0.3 mmol TOPO + 0.6 mmol OLA; c, d) 0.3 mmol TOPO + 0.6 mmol OA and e, f) 0.3 mmol TOPO. Scale bar: 50 nm.



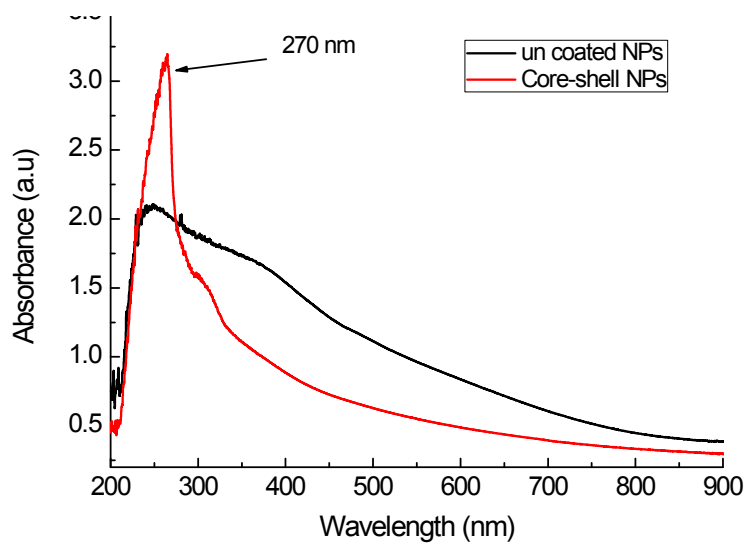

**Figure S3:** UV-vis spectra of the PMAO encapsulated CoFe (black line) and CoFe@Pt core/shell (red line) NPs.

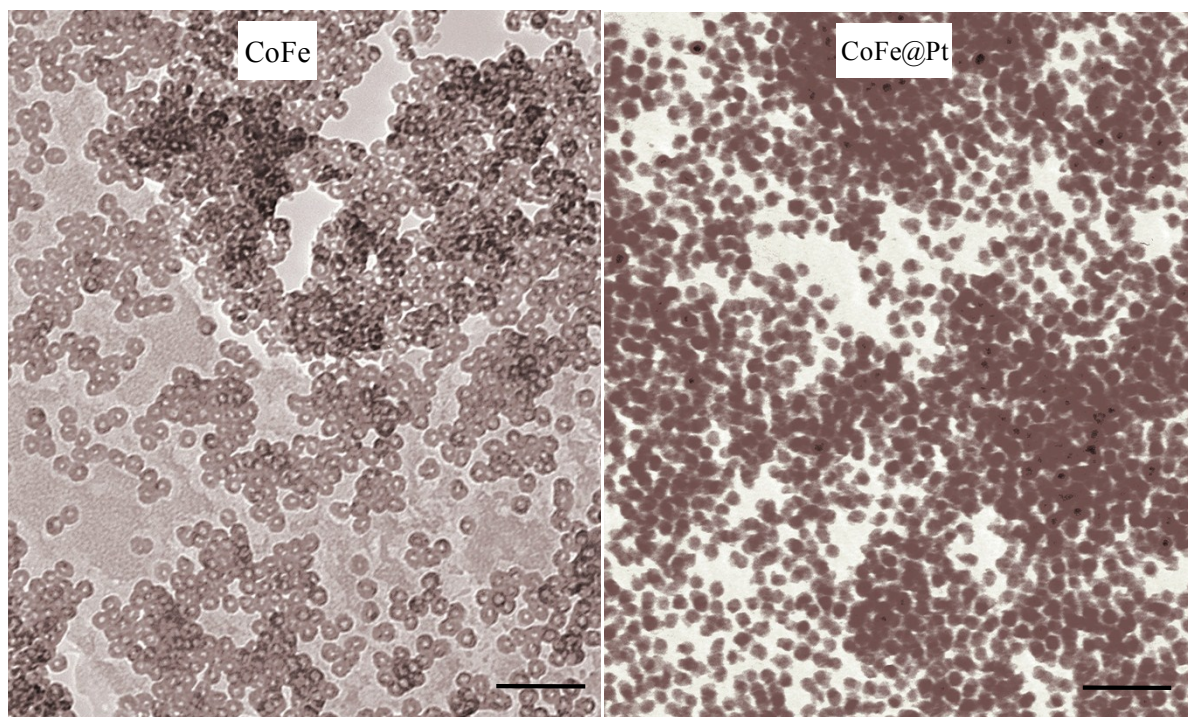

**Figure S4:** TEM images of CoFe nanoparticles (left) and CoFe@Pt core/shell nanoparticles (right) after exposing in air for one week. Scale bar: 50 nm.
